# Supplementary material for: A ROS scavenging protein nanocage forin vitroandin vivoantioxidant treatment
Source: Royal Society of Chemistry journal article supplement (doi:10.1039/d0nr08878a), 2021-01-01
Supplement: d0nr08878a1.pdf [file d0nr08878a1.pdf]

## SUPPORTING INFORMATION

### A ROS Scavenging Protein Nanocage for *In Vitro* and *In Vivo*

#### Antioxidant Treatment

*Weiwei Zhu<sup>a,†</sup>, Ti Fang<sup>a,†</sup>, Wenjing Zhang<sup>a,c</sup>, Ao Liang<sup>a,c</sup>, Hui Zhang<sup>a</sup>, Zhi-Ping Zhang<sup>a</sup>, Xian-En Zhang<sup>b,c</sup> and Feng Li<sup>a,c\*</sup>*

<sup>a</sup>State Key Laboratory of Virology, Wuhan Institute of Virology, Center for Biosafety Mega-Science, Chinese Academy of Sciences, Wuhan, 430071, China

<sup>b</sup>National Laboratory of Biomacromolecules, CAS Center for Excellence in Biomacromolecules, Institute of Biophysics, Chinese Academy of Sciences, Beijing, 100101, China

<sup>c</sup>University of Chinese Academy of Sciences, Beijing, 100049, China

\*Corresponding author, email: [fli@wh.iov.cn](mailto:fli@wh.iov.cn)

†Weiwei Zhu and Ti Fang contributed equally to this work.

## Materials and Methods

**Materials.** Fetal bovine serum (FBS), Dulbecco's modified Eagle's medium (DMEM), sodium pyruvate (100 mM), Opti-MEM, Hoechst 33342 (D1306), LysoTracker Red (L7528), and Alexa Fluor 555 NHS ester (A555, A20009) were supplied by Life Technologies (Carlsbad, CA, USA). Penicillin, streptomycin, and Cell Counting Kit-8 (CCK-8, C0038) were purchased from Beyotime Biotechnology (Shanghai, China). Fluorescein isothiocyanate (FITC, F4274); 2',7'-dichlorodihydrofluorescein diacetate (DCFH-DA, D6883); methylene blue (MB, M106894); hydrogen peroxide (H<sub>2</sub>O<sub>2</sub>, H112520); and iron(II) sulfate heptahydrate (FeSO<sub>4</sub>·7H<sub>2</sub>O, F116339) were purchased from Sigma-Aldrich (Saint Louis, MO, USA). Deferoxamine (DFO, D873692) was purchased from Macklin (Shanghai, China). Phorbol 12-myristate 13-acetate (PMA, P167764) was purchased from Aladdin (Shanghai, China). HFF-1 cells were obtained from the Cell Bank of the Chinese Academy of Sciences (Shanghai, China) and cultured in complete medium (DMEM containing 15% FBS, 1 mM sodium pyruvate, 100 U/mL penicillin and 100 µg/mL streptomycin) at 37°C in 5% CO<sub>2</sub>.

**Plasmid construction, protein preparation and labeling.** The genetic modification sites of wtDps were chosen by analyzing its crystal structure (PDB ID: 1QGH) to add the fused peptide on the outer surface of Dps. To add polyhistidine fragments with varied lengths (1-7 histidines) and the spacer peptide (GLNDIFEAQKIEWHE) to the N-terminus of wtDps, eight coding sequences (BDps and H<sub>n</sub>BDps, n = 1-7) were constructed with the wtDp gene as the initial template and cloned into the pET32a vector between the *NdeI* and *XhoI* sites. For construction of the expression vector of human ferritin heavy chain (FTH), the coding sequence was cloned into the pET32a vector between the *NdeI* and *XhoI* sites.

The expression and extraction of wtDps, BDps, H<sub>n</sub>BDps, and human ferritin heavy chain (FTH) were performed by the same procedure. In particular, the expression was induced by the addition of 1 mM IPTG at 25°C when the cultures reached an OD<sub>600</sub> of 0.6. Next, cells were harvested after 12 h, suspended and lysed by high-pressure homogenization. After centrifugation at 12,000 ×g for 30 min, the soluble extract was collected, heated at 60°C for 10 min, and centrifuged again at 12,000 ×g for 30 min to recover the supernatant. For purification, wtDps, BDps and H<sub>1</sub>BDps in the supernatant were precipitated by ammonium sulfate at 50-80% saturation. The precipitate was suspended in 20 mM Tris-HCl (pH = 7.2), dialyzed overnight to remove residual ammonium sulfate, and further purified by size exclusion chromatography with a Super Index 200 column (GE Healthcare, Madison, WI, USA). In the case of H<sub>n</sub>BDps (n = 2-7), the supernatant was applied to a HisTrap HP column (GE Healthcare, Madison, WI, USA) and purified according to the manufacturer's instructions. For purification of FTH, it was precipitated from the supernatants by ammonium sulfate at 20-60% saturation. The precipitate was suspended in phosphate-buffered saline (PBS), which was followed by centrifugation at 12,000 ×g for 30 min. The resulting supernatant was subjected to ultracentrifugation at 50,000 rpm (Ty 70, Beckman, Brea, CA, USA) for 1 h. The precipitate was suspended in PBS. Protein concentration was quantified by SDS-PAGE/densitometry.

To incorporate and mineralize iron oxide nanoparticles in the inner cavity of H<sub>2</sub>BDps, a protein solution (0.5 mg/mL H<sub>2</sub>BDps in 20 mM MOPS-NaOH, pH 7.0) was bubbled with nitrogen to displace oxygen. After incubation with 1 mM (NH<sub>4</sub>)<sub>2</sub>Fe(SO<sub>4</sub>)<sub>2</sub> for 5 min at room temperature, the solution slowly oxidized at room temperature for 20 min in air and was centrifuged at 10,000 ×g for 10 min to remove the precipitate. The collected supernatant was dialyzed against PBS to obtain iron oxide nanoparticles@H<sub>2</sub>BDps (IONP@H<sub>2</sub>BDps). Iron contents in the inner cavity of H<sub>2</sub>BDps (0.7 mg/mL) and IONP@H<sub>2</sub>BDps (0.65 mg/mL) were measured by inductively coupled plasma atomic emission spectroscopy (ICP-AES) (IRIS Intrepid II XPS, Thermo, Franklin, MA, USA).

Fluorescence labeling of proteins with A555 or FITC was performed in 100 mM NaHCO<sub>3</sub> (pH 8.3) containing 1 mg/mL protein and 70 µg/mL A555 or 150 µg/mL FITC. After incubation for 1 h at room temperature and overnight at 4°C, the modified protein was dialyzed against PBS. Fluorescence of the labeled samples was characterized using an LS55 luminescence spectrometer (PerkinElmer, Waltham, MA, USA).

**Transmission electron microscopy (TEM).** A protein sample at a concentration of 0.1 mg/mL (20 µL) was dropped on a carbon-coated copper grid. After incubation for 5 min, the solution was removed by filter paper. Then, the grid was stained with 2% phosphotungstate for 5 min. The sample was observed under a Hitachi H7000 TEM equipped with an Olympus MegaView G2 camera. TEM images were processed and analyzed using ImageJ.

**Hydrodynamic size and zeta potential measurements.** The measurements were performed on a Zetasizer Nano ZS (Malvern Instruments, Malvern, Worcestershire, UK) with automatically optimized parameters. Before hydrodynamic size measurement by dynamic light scattering (DLS), samples were filtered with 0.2-µm syringe filters and then centrifuged at 13,000 rpm for 5 min. Samples were in 1× PBS or 0.2× PBS for hydrodynamic size or zeta potential measurement, respectively. Data were collected by Zetasizer Software Version 6.01.

**Cellular uptake analysis.** HFF-1 cells were seeded into 12-well plates at 2×10<sup>5</sup>/well and cultured overnight. Then, the cells were incubated with 5 µg/mL A555-labeled Dps in Opti-MEM for 4 h and then with complete medium for additional 12 h. Finally, the cells were harvested, suspended in 300 µL ice-cold PBS, and analyzed by flow cytometry (BD LSRFortessa, BD Biosciences, San Jose, CA, USA).

**Studies on endocytic pathways and subcellular distribution.** For investigation of endocytic pathways, amiloride (1 mM), nystatin (30 µM), and hypertonic sucrose (0.4 M) were used to inhibit micropinocytosis, caveolae/lipid raft-mediated endocytosis, and clathrin-mediated endocytosis, respectively. HFF-1 cells (2×10<sup>5</sup>) were seeded in a 35-mm glass-bottomed dish and cultured for 12 h. After further incubation in FBS-free medium for 2 h, the cells were treated with different inhibitors for 1 h at 37°C. Then, the cells were incubated with 5 µg/mL H<sub>n</sub>BDps-A555 in Opti-MEM for additional 4 h. After nuclear staining, cell images were captured by a Nikon A1 confocal laser-scanning microscope (Tokyo, Japan) and processed with ImageJ.

For subcellular distribution, HFF-1 cells ( $2 \times 10^5$ ) were seeded in a 35-mm glass-bottomed dish and cultured for 12 h. After being washed twice with PBS, the cells were incubated with FITC-conjugated H<sub>2</sub>BDps (20 µg/mL) in Opti-MEM for 4 h at 37°C. After incubation for additional 20 h with complete medium, the cells were washed with PBS thrice and then fixed with 4% paraformaldehyde for 20 min at room temperature. LysoTracker Red (75 nM) and Hoechst 33342 (5 µg/mL) were added to stain cell lysosomes/endosomes and nuclei, respectively. Fluorescence images were recorded by a Nikon A1 confocal laser-scanning microscope (Tokyo, Japan) and processed with ImageJ. Pearson's coefficients for the colocalization between lysosomes and H<sub>n</sub>BDps (n = 2-7) were calculated using Volocity (PerkinElmer, Waltham, MA, USA).

**Cytotoxicity analysis.** HFF-1 cells were seeded into 96-well plates at  $1.0 \times 10^4$ /well and cultured overnight. After incubation for another 4 h in 100 µL Opti-MEM containing 20 µg/mL Dps, cells were incubated with complete medium for 12 h. Next, 10 µL of CCK-8 solution was added to each well, and the absorbance at 450 nm was measured after 1.5 h by means of an EnSpire 2300 microplate reader (PerkinElmer, Waltham, MA, USA).

**Protection of human cells from H<sub>2</sub>O<sub>2</sub> challenge.** HFF-1 cells were seeded into 24-well plates at  $1.0 \times 10^5$ /well, cultured overnight, and then incubated for another 4 h with Dps at the indicated concentrations in Opti-MEM. Afterwards, the cells were treated with 4 mM H<sub>2</sub>O<sub>2</sub> for 12 h and then observed by an Olympus IX73 optical microscope (Tokyo, Japan). Alternatively, after treatment with 4 mM H<sub>2</sub>O<sub>2</sub> for 30 min, the cells were incubated with 50 µM DCFH-DA for 30 min. Fluorescence images were captured by an IX73 microscope to detect intracellular ROS. Cell viability was determined by CCK-8.

**In vitro inhibitory effect of Dps on the Fenton reaction.** A solution of methylene blue (MB) (31.3 µM in ddH<sub>2</sub>O) containing 35.8 µM FeSO<sub>4</sub> and 441 µM H<sub>2</sub>O<sub>2</sub> was mixed at the indicated concentrations of Dps for 20 min at room temperature, and the developed absorbance was measured at 665 nm ( $A_i$ ) by an EnSpire 2300 microplate reader. The absorbance at 665 nm of MB solution ( $A_o$ ) and MB solution with FeSO<sub>4</sub> and H<sub>2</sub>O<sub>2</sub> ( $A_c$ ) were used as blanks. The apparent inhibition rate was calculated as  $((A_i - A_c)/(A_o - A_c)) \times 100\%$ .<sup>1</sup>

**Anti-inflammation of Dps in vivo.** SPF (Specific Pathogen Free) female ICR mice (6 weeks) purchased from Beijing Wei-tong Li-hua Experimental Animal Technology Co. Ltd (Beijing, China) were used to establish a PMA-induced inflammation model as previously described.<sup>2</sup> Next, the mice were subcutaneously injected with Dps proteins at a dose of 15 mg/kg 5 h after PMA induction. After 1.5 h, 50 µL of DCFH-DA (1 mM) was subcutaneously injected. After incubation for 0.5 h, the ROS levels of mice were recorded after hair removal by a PerkinElmer *In vivo* Imaging System (Ex: 488 nm; Em: 520 nm). Alternatively, the right ears were isolated and fixed in 4% PFA after washing with PBS. Then, the tissues were sectioned at a thickness of 5 µm, stained with hematoxylin and eosin (H&E), and imaged by a Panoramic MIDI system (3DHISTECH, Budapest, Hungary).

## Supplementary Results and Discussion

Members of the ferritin-like superfamily are abundantly found in all life forms as iron storage proteins.<sup>3</sup> Although human ferritins are cytoprotective antioxidants as they mineralize iron,<sup>4</sup> their mineralization mechanism is different from that of Dps. Specifically, human ferritins use O<sub>2</sub> as the oxidant to oxidize and mineralize Fe<sup>2+</sup>, whereas Dps exhibits a higher reactivity with H<sub>2</sub>O<sub>2</sub>. The rate of Fe<sup>2+</sup> oxidation by H<sub>2</sub>O<sub>2</sub> in Dps is 1,000-fold faster than that by O<sub>2</sub>, and the rate of Fe<sup>2+</sup> oxidation by O<sub>2</sub> in Dps is much slower than that in human ferritins.<sup>5</sup> Therefore, the antioxidant activity of Dps is not impaired by ubiquitous O<sub>2</sub>, unlike human ferritins and is only activated in the presence of H<sub>2</sub>O<sub>2</sub>. As Dps eliminates both Fe<sup>2+</sup> and H<sub>2</sub>O<sub>2</sub>, it should be advantageous over human ferritins in preventing oxidative damage from the Fenton reaction.

To investigate the difference, the antioxidant activity of FTH was compared to H<sub>2</sub>BDps. The cage-like morphology of FTH was confirmed by TEM after expression and purification (Fig. S7). Cell internalization studies confirmed that FTH and H<sub>2</sub>BDps exhibited similar uptake efficiencies by HFF-1 cells under equivalent conditions (Fig. S8). Moreover, previous studies have shown that FTH is internalized through clathrin-mediated endocytosis,<sup>6</sup> which is similar to H<sub>2</sub>BDps. When challenged with H<sub>2</sub>O<sub>2</sub>, cells treated with H<sub>2</sub>BDps demonstrated a normal spindle shape, whereas cells pretreated with FTH demonstrated an apoptotic morphology (Fig. S9a). The viability of cells pretreated with FTH was reduced to less than 20%, which is similar to that of the PBS-pretreated cells (Fig. S9b). Brightfield microscopy analysis and the CCK-8 assay consistently demonstrated that FTH did not protect HFF-1 cells from oxidative damage. Clearly, Dps is a unique antioxidant for human cells because it sequesters Fe<sup>2+</sup> only in the response of H<sub>2</sub>O<sub>2</sub>, which is an advantage over human ferritins.

Desferrioxamine (DFO), an FDA-approved, representative antioxidant, takes effect by chelating iron ions to inhibit the Fenton reaction.<sup>7</sup> Therefore, the antioxidant activity of H<sub>2</sub>BDps was also compared with DFO. As shown in Fig. S9a,b, when HFF-1 cells were pretreated with DFO at gradient concentrations (0.03, 0.33, and 3.33 mg/mL) and challenged with 4 mM H<sub>2</sub>O<sub>2</sub>, the cells pretreated with DFO at lower concentrations shrank remarkably and exhibited less than 30% viability. Even at the highest tested concentration of DFO (3.33 mg/mL), the cell viability was only 59.7%, which was lower than that of the 20 µg/mL H<sub>2</sub>BDps-pretreated group (86.3%). The significantly lower efficacy of DFO may be due to poor cellular uptake and cytotoxicity at high concentrations.<sup>8</sup> The comparison demonstrated that H<sub>2</sub>BDps performs much better than the classical iron chelator DFO.

## Supplementary Figures

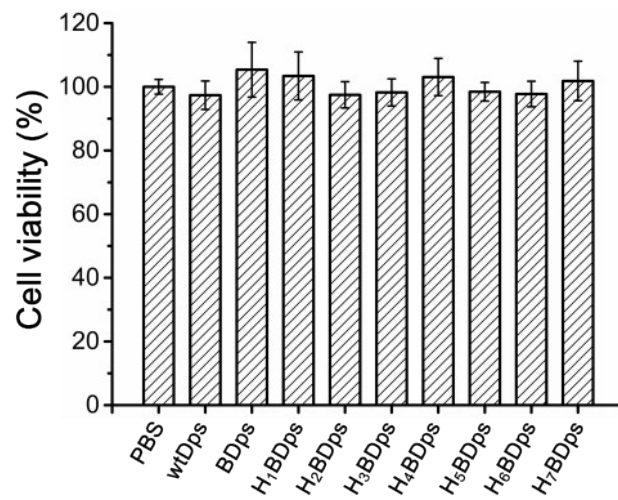

**Fig. S1** Viability of HFF-1 cells incubated with different H<sub>n</sub>BDps constructs (20 µg/mL) analyzed using the CCK-8 assay. Data are means ± SD of triplicate experiments.

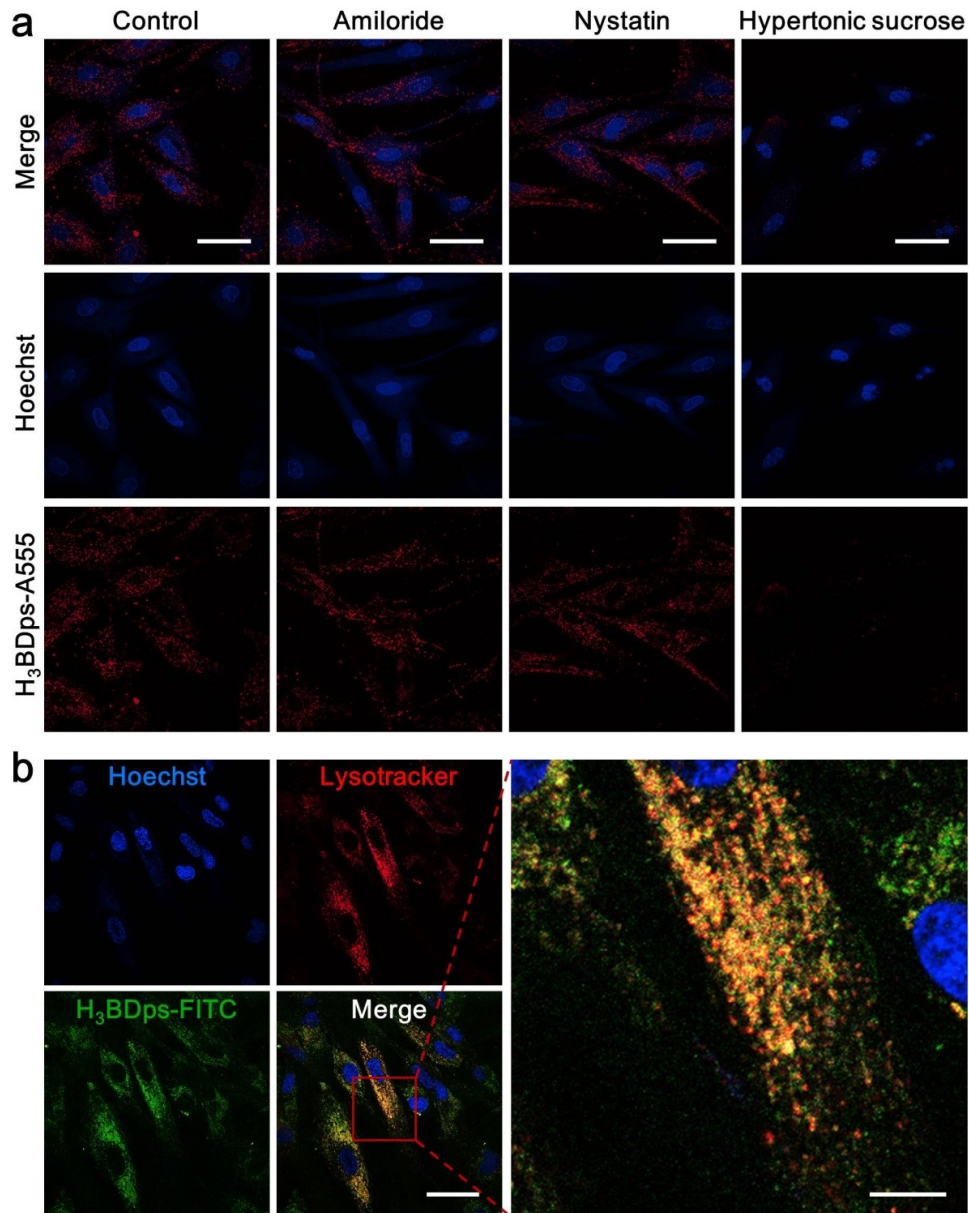

**Fig. S2** Endocytic mechanism of H<sub>3</sub>BDps. **(a)** Confocal microscopy imaging of the endocytic pathway of H<sub>3</sub>BDps. HFF-1 cells were treated with different inhibitors for 1 h at 37°C. Nontreated cells were used as controls. The cells were incubated for 4 h with Opti-MEM containing A555-labeled H<sub>3</sub>BDps (H<sub>3</sub>BDps-A555; 5 µg/mL) and then imaged. Only hypertonic sucrose inhibited the internalization of H<sub>3</sub>BDps. **(b)** Confocal microscopy imaging of the subcellular distribution of H<sub>3</sub>BDps. HFF-1 cells were incubated with FITC-conjugated H<sub>3</sub>BDps (5 µg/mL) for 4 h at 37°C and then with complete medium for 20 h. The cells were fixed, stained with LysoTracker Red (75 nM) and Hoechst 33342 (5 µg/mL) for 20 min, and then imaged. Here, H<sub>3</sub>BDps was labeled by FITC instead of A555 to avoid cross-talk with LysoTracker Red. H<sub>3</sub>BDps was colocalized with endosomes/lysosomes with a Pearson's correlation coefficient of  $0.69 \pm 0.02$ . Scale bars = 50 µm or 10 µm (zoom-in).

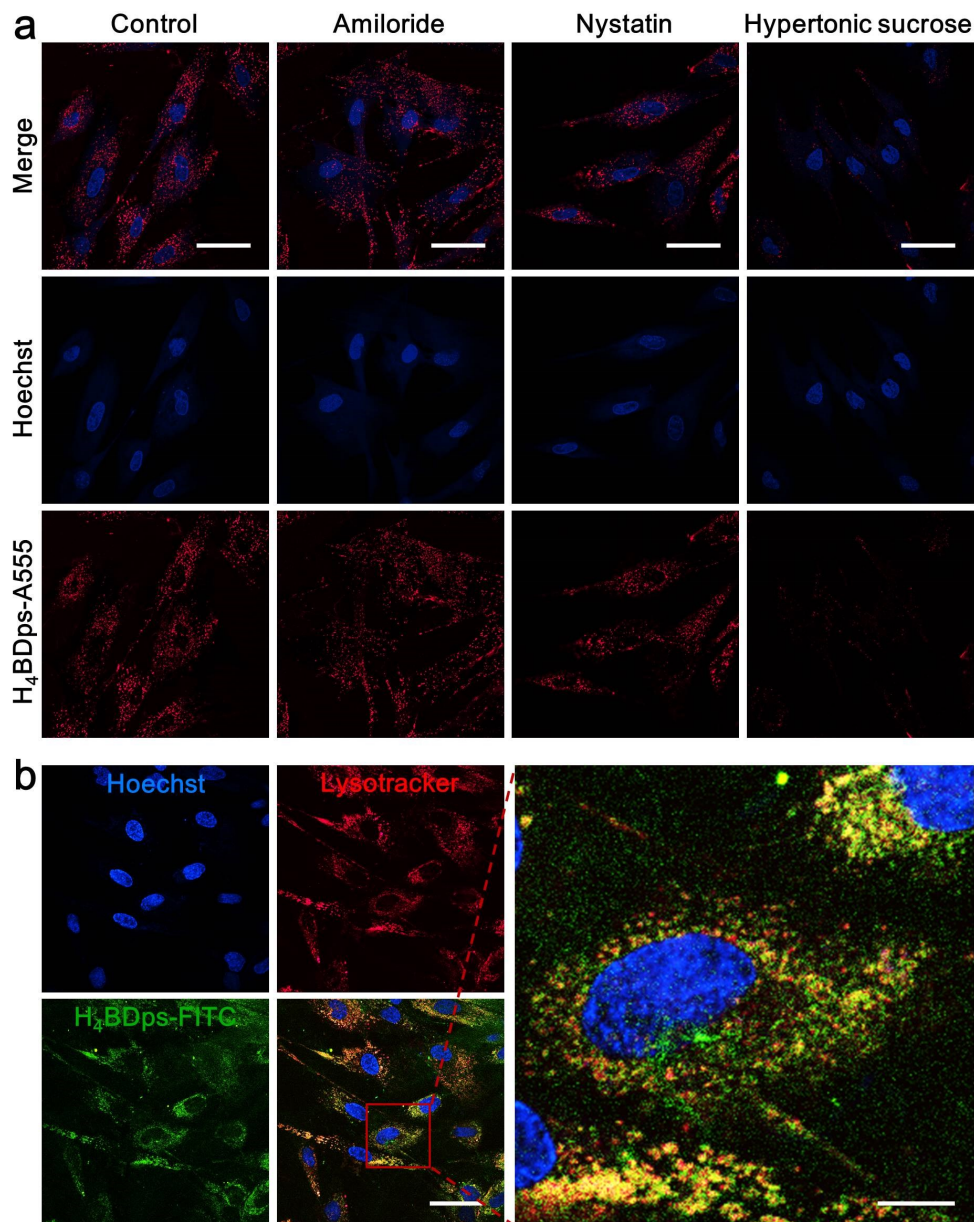

**Fig. S3** Endocytic mechanism of H<sub>4</sub>BDps. **(a)** Confocal microscopy imaging of the endocytic pathway of H<sub>4</sub>BDps. HFF-1 cells were treated with different inhibitors for 1 h at 37°C. Nontreated cells were used as controls. The cells were incubated for 4 h with Opti-MEM containing A555-labeled H<sub>4</sub>BDps (H<sub>4</sub>BDps-A555; 5 µg/mL) and then imaged. Only hypertonic sucrose inhibited the internalization of H<sub>4</sub>BDps. **(b)** Confocal microscopy imaging of the subcellular distribution of H<sub>4</sub>BDps. HFF-1 cells were incubated with FITC-conjugated H<sub>4</sub>BDps (5 µg/mL) for 4 h at 37°C and then with complete medium for 20 h. The cells were fixed, stained with LysoTracker Red (75 nM) and Hoechst 33342 (5 µg/mL) for 20 min, and then imaged. Here H<sub>4</sub>BDps was labeled by FITC, instead of A555 to avoid crosstalk with LysoTracker Red. H<sub>4</sub>BDps was colocalized with endosomes/lysosomes with a Pearson's correlation coefficient of  $0.64 \pm 0.08$ . Scale bars = 50 µm or 10 µm (zoom-in).



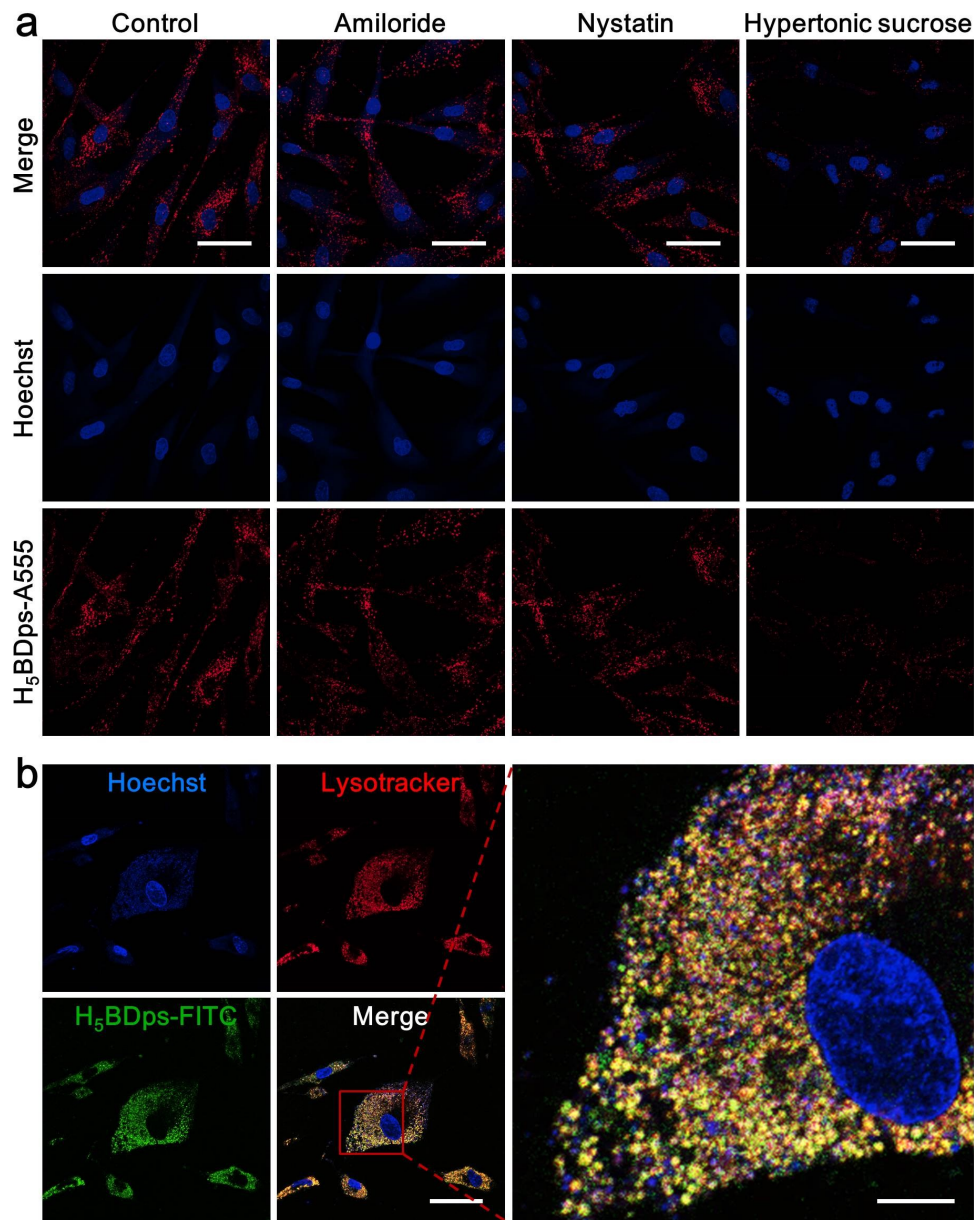

**Fig. S4** Endocytic mechanism of H<sub>5</sub>BDps. **(a)** Confocal microscopy imaging of the endocytic pathway of H<sub>5</sub>BDps. HFF-1 cells were treated with different inhibitors for 1 h at 37°C. Nontreated cells were used as controls. The cells were incubated for 4 h with Opti-MEM containing A555-labeled H<sub>5</sub>BDps (H<sub>5</sub>BDps-A555; 5 µg/mL) and then imaged. Only hypertonic sucrose inhibited the internalization of H<sub>5</sub>BDps. **(b)** Confocal microscopy imaging of the subcellular distribution of H<sub>5</sub>BDps. HFF-1 cells were incubated with FITC-conjugated H<sub>5</sub>BDps (5 µg/mL) for 4 h at 37°C and then with complete medium for 20 h. The cells were fixed, stained with LysoTracker Red (75 nM) and Hoechst 33342 (5 µg/mL) for 20 min, and then imaged. Here H<sub>5</sub>BDps was labeled by FITC, instead of A555 to avoid crosstalk with LysoTracker Red. H<sub>5</sub>BDps was colocalized with endosomes/lysosomes with a Pearson's correlation coefficient of  $0.66 \pm 0.05$ . Scale bars = 50 µm or 10 µm (zoom-in).

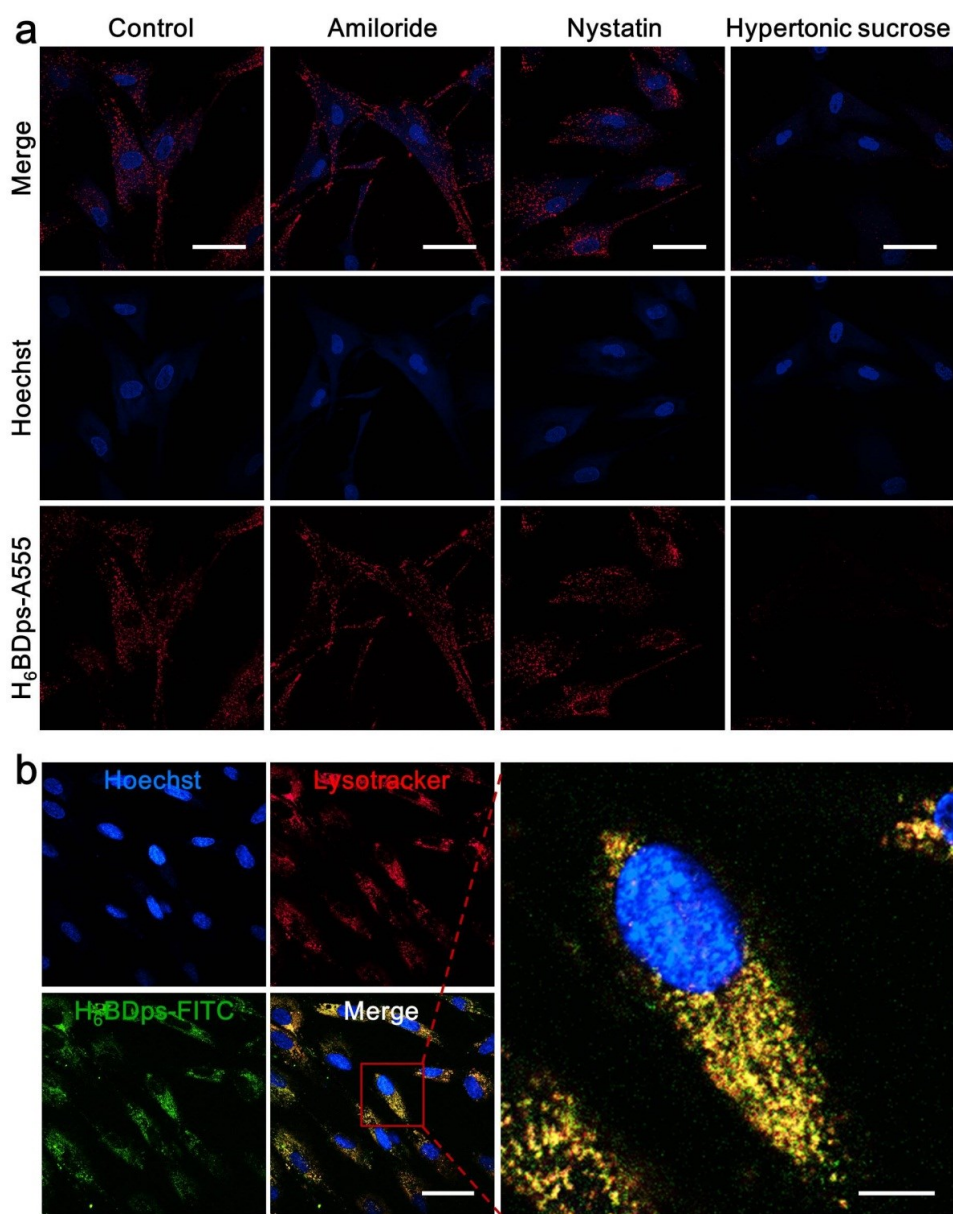

**Fig. S5** Endocytic mechanism of H<sub>6</sub>BDps. **(a)** Confocal microscopy imaging of the endocytic pathway of H<sub>6</sub>BDps. HFF-1 cells were treated with different inhibitors for 1 h at 37°C. Nontreated cells were used as controls. The cells were incubated for 4 h with Opti-MEM containing A555-labeled H<sub>6</sub>BDps (H<sub>6</sub>BDps-A555; 5 µg/mL) and then imaged. Only hypertonic sucrose inhibited the internalization of H<sub>6</sub>BDps. **(b)** Confocal microscopy imaging of the subcellular distribution of H<sub>6</sub>BDps. HFF-1 cells were incubated with FITC-conjugated H<sub>6</sub>BDps (5 µg/mL) for 4 h at 37°C and then with complete medium for 20 h. The cells were fixed, stained with LysoTracker Red (75 nM) and Hoechst 33342 (5 µg/mL) for 20 min, and then imaged. Here H<sub>6</sub>BDps was labeled by FITC, instead of A555 to avoid crosstalk with LysoTracker Red. H<sub>6</sub>BDps was colocalized with endosomes/lysosomes with a Pearson's correlation coefficient of  $0.66 \pm 0.07$ . Scale bars = 50 µm or 10 µm (zoom-in).

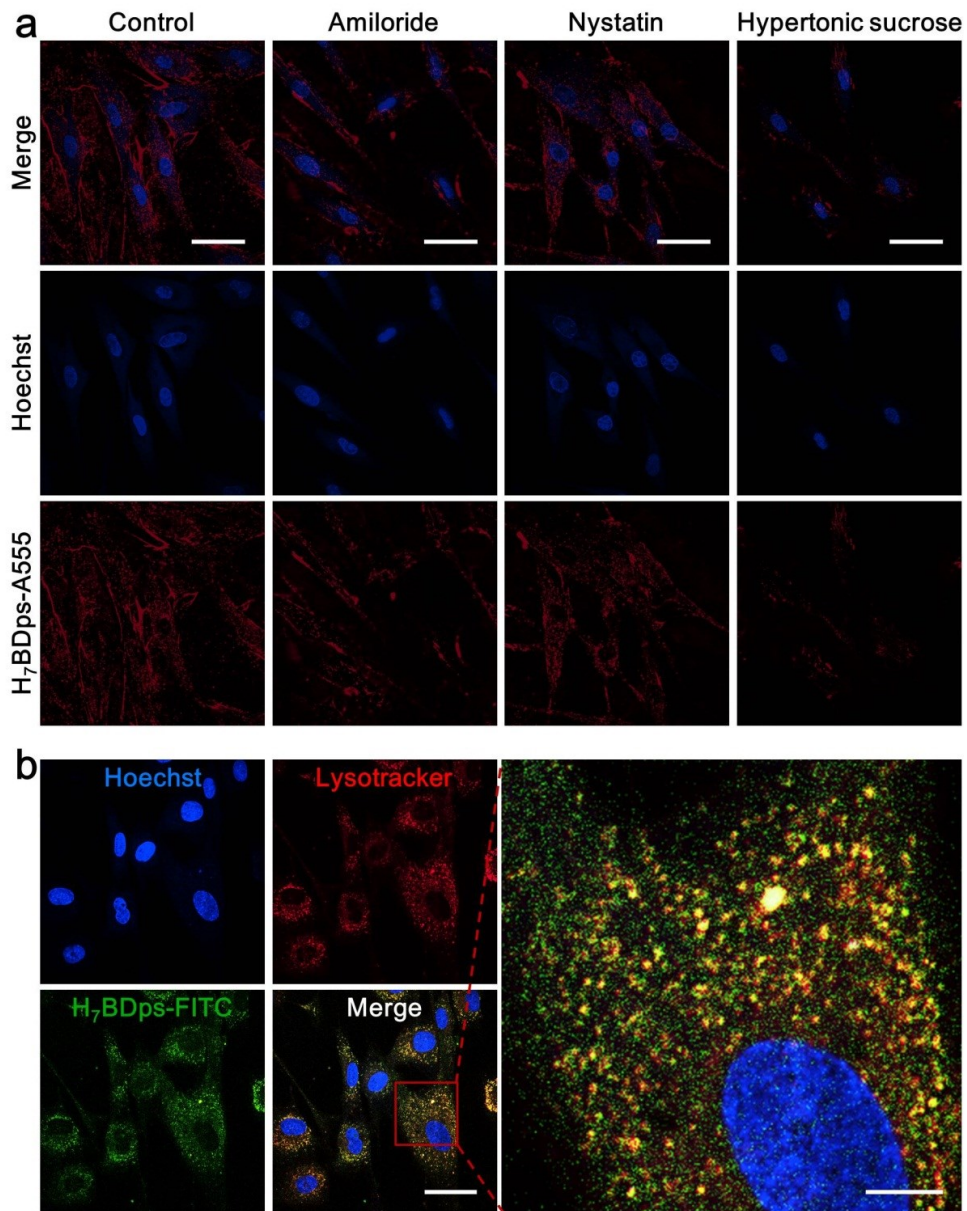

**Fig. S6** Endocytic mechanism of H<sub>7</sub>BDps. **(a)** Confocal microscopy imaging of the endocytic pathway of H<sub>7</sub>BDps. HFF-1 cells were treated with different inhibitors for 1 h at 37°C. Non-treated cells were used as controls. The cells were incubated for 4 h with Opti-MEM containing A555-labeled H<sub>7</sub>BDps (H<sub>7</sub>BDps-A555; 5 µg/mL) and then imaged. Only hypertonic sucrose inhibited the internalization of H<sub>7</sub>BDps. **(b)** Confocal microscopy imaging of the subcellular distribution of H<sub>7</sub>BDps. HFF-1 cells were incubated with FITC-conjugated H<sub>7</sub>BDps (5 µg/mL) for 4 h at 37°C and then with complete medium for 20 h. The cells were fixed, stained with LysoTracker Red (75 nM) and Hoechst 33342 (5 µg/mL) for 20 min, and then imaged. Here H<sub>7</sub>BDps was labeled by FITC, instead of A555 to avoid crosstalk with LysoTracker Red. H<sub>7</sub>BDps was colocalized with endosomes/lysosomes with a Pearson's correlation coefficient of  $0.59 \pm 0.07$ . Scale bars = 50 µm or 10 µm (zoom-in).

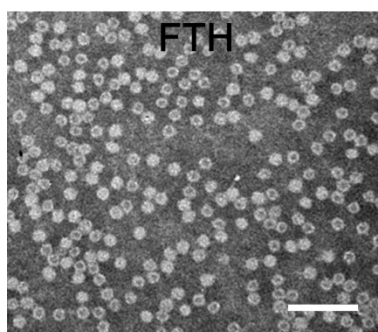

**Fig. S7** Negative-staining TEM image of FTH. Scale bar = 50 nm.

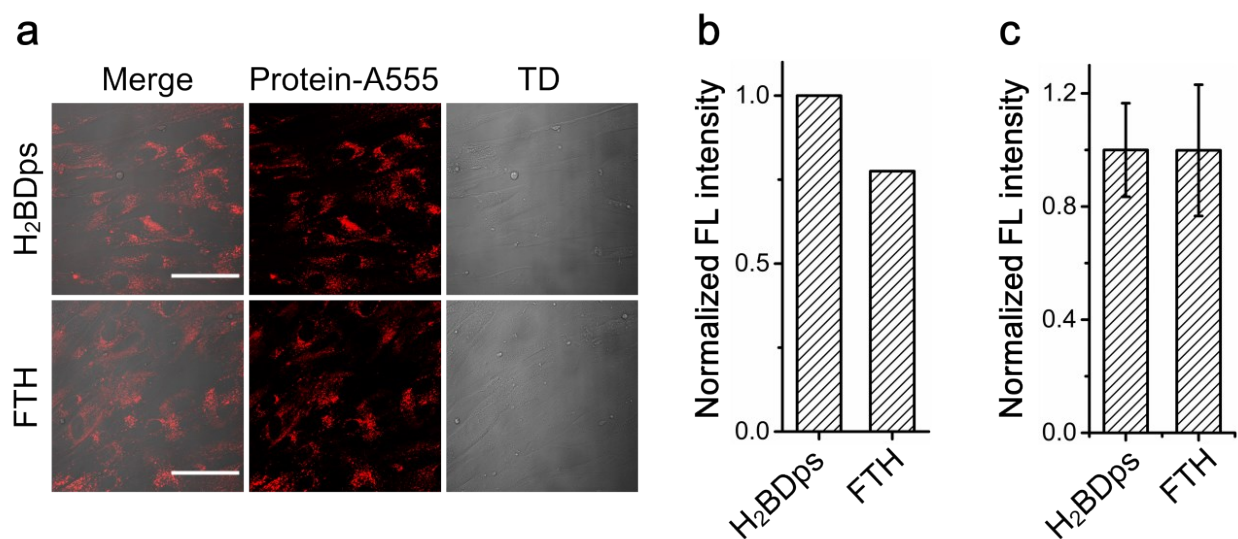

**Fig. S8** Comparison of cellular uptake between H<sub>2</sub>BDps and FTH. **(a)** After incubation with 81.9 nM (based on protein cages) A555-modified H<sub>2</sub>BDps or FTH in Opti-MEM for 4 h, HFF-1 cells were cultured in complete medium for additional 12 h and then imaged. Confocal images reveal that the two types of protein cages were internalized by HFF-1 cells. Scale bars = 50  $\mu$ m. **(b)** Normalized fluorescence (FL) intensity of H<sub>2</sub>BDps and FTH labeled with A555. Both samples were diluted to a protein concentration of 41 nM and excited at 550 nm with the fluorescence intensity at 580 nm recorded on a luminescence spectrometer. **(c)** Quantitative analysis of the cellular uptake of H<sub>2</sub>BDps and FTH via Volocity software indicated that the cellular uptake efficiencies of H<sub>2</sub>BDps and FTH were similar. The fluorescence intensities were standardized based on the normalized fluorescence intensity of H<sub>2</sub>BDps and FTH in (b) and normalized to that of cells incubated with H<sub>2</sub>BDps. Data are means  $\pm$  SD of triplicate experiments.

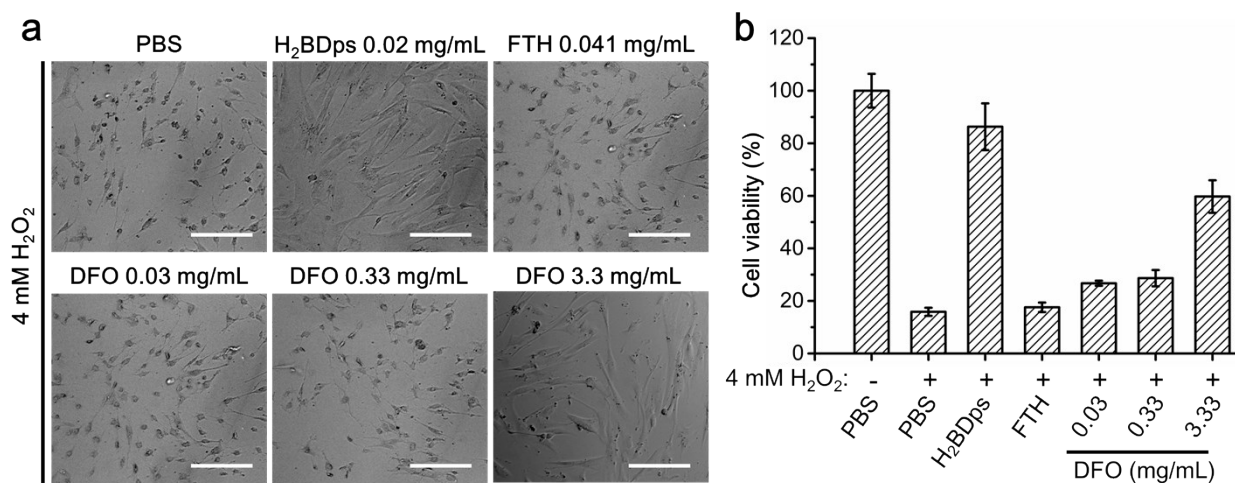

**Fig. S9** Comparison of antioxidant effects among H<sub>2</sub>BDps, FTH, and DFO in cultured cells. HFF-1 cells were incubated with 20  $\mu$ g/mL H<sub>2</sub>BDps, 41  $\mu$ g/mL FTH, or 0.03-3.33 mg/mL DFO for 4 h and then treated with 4 mM H<sub>2</sub>O<sub>2</sub> for 12 h followed by microscopic imaging (**a**) and CCK-8 assay (**b**). The molar concentrations of H<sub>2</sub>BDps and FTH used were equivalent (81.9 nM of protein cages), and that of DFO ranged from 0.05 to 5 mM (corresponding to 0.03-3.33 mg/mL). Scale bars = 200  $\mu$ m. Data are means  $\pm$  SD of triplicate experiments.

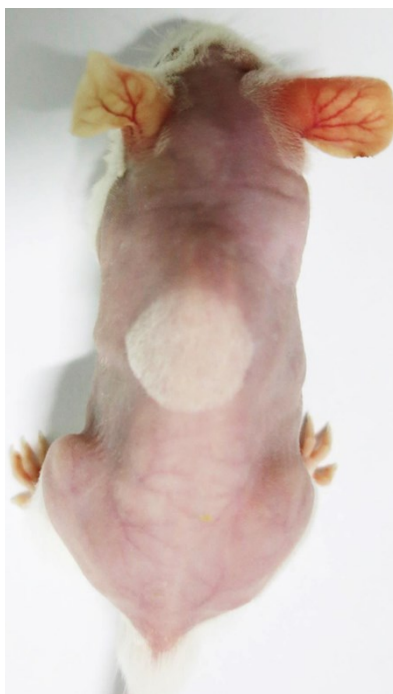

**Fig. S10** Image of the mouse with an inflamed right ear induced by PMA.

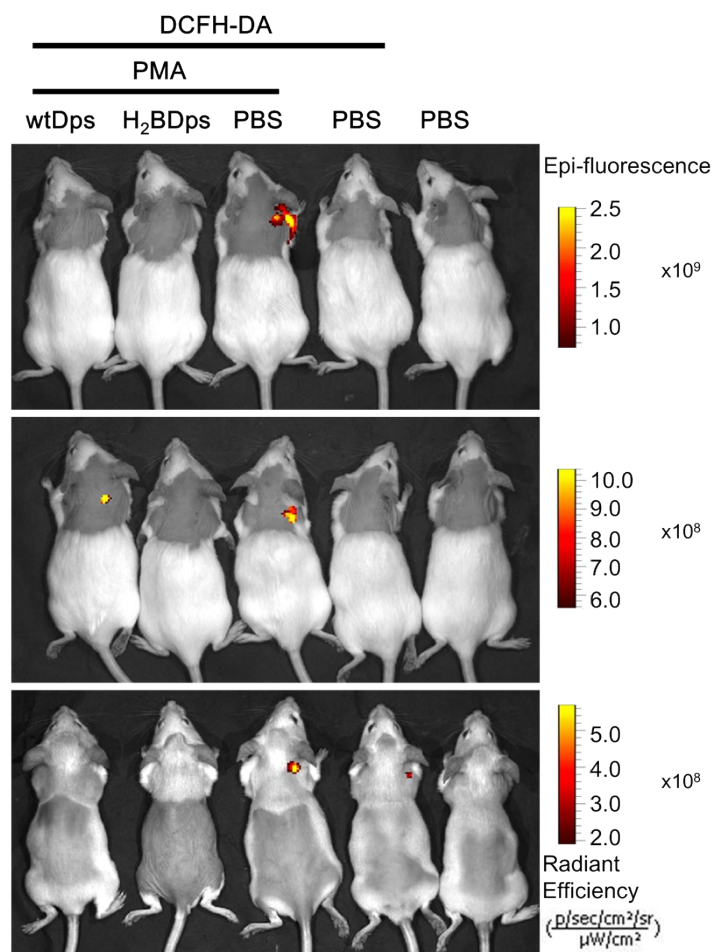

**Fig. S11** Fluorescence images of mice with PMA-induced ear inflammation after treatment with 15 mg/kg H<sub>2</sub>BDps or wtDps through subcutaneous injection.

## REFERENCES

- 1 K. Dutta, S. Mukhopadhyay, S. Bhattacharjee and B. Chaudhuri, *J. Hazard.Mater.*, 2001, **84**, 57-71.
- 2 J. Yao, Y. Cheng, M. Zhou, S. Zhao, S. Lin, X. Wang, J. Wu, S. Li and H. Wei, *Chem. Sci.*, 2018, **9**, 2927-2933.
- 3 G. Jutz, P. van Rijn, B. Santos Miranda and A. Böker, *Chem. Rev.*, 2015, **115**, 1653-1701.
- 4 G. Balla, H. S. Jacob, J. Balla, M. Rosenberg, K. Nath, F. Apple, J. W. Eaton and G. M. Vercellotti, *J. Biol. Chem.*, 1992, **267**, 18148-18153.
- 5 M. Su, S. Cavallo, S. Stefanini, E. Chiancone and N. D. Chasteen, *Biochemistry*, 2005, **44**, 5572-5578.
- 6 S. W. Hulet, S. O. Heyliger, S. Powers and J. R. Connor, *J. Neurosci.Res.*, 2000, **61**, 52-60.

7. P. Holden and L. S. Nair, *Tissue Eng. Part B Rev.*, 2019, **25**, 461-470.
8. B. Halliwell, *Free Radic. Biol. Med.*, 1989, **7**, 645-651.
